# Supplementary material for: Results of a “GWAS Plus:” General Cognitive Ability Is Substantially Heritable and Massively Polygenic
Source: PLOS journal article supplement (doi:10.1371/journal.pone.0112390), 2014-11-10
Supplement: S4 (10.1371/journal.pone.0112390.s004) [file journal.pone.0112390.s004]

Figure S4. Chi-square quantile-quantile plots of squared Mahalanobis distances (from the origin) of families' FGLS residual vectors, graphed separately by family size.

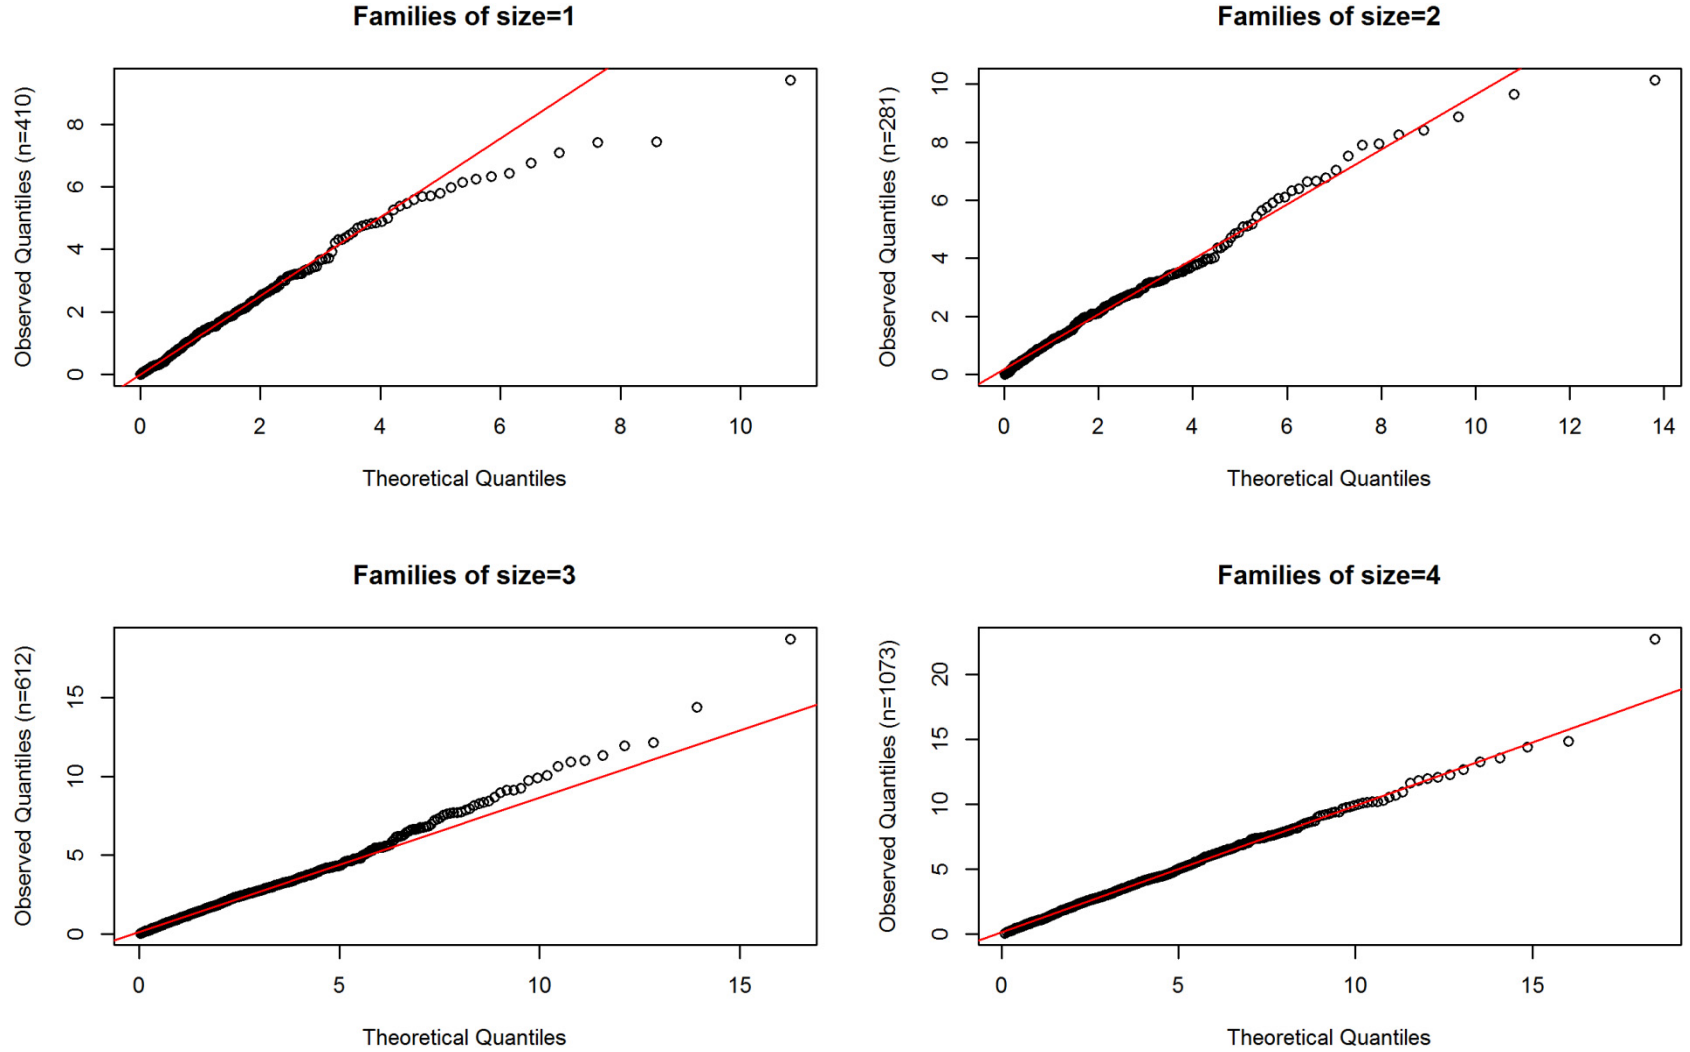

Let  $\mathbf{\epsilon}_i$  denote the  $s_i \times 1$  column vector of FGLS residuals (from the covariates-only regression) of family  $i$ . Let  $\hat{\Sigma}_i$  denote the  $s_i \times s_i$  symmetric block of the estimated residual-covariance matrix  $\hat{\Sigma}$  that corresponds to family  $i$ —basically,  $\hat{\Sigma}_i$  is the matrix giving the estimated residual-covariance structure for a family of the same type and composition of family  $i$ . Then, family  $i$ 's squared Mahalanobis distance from the origin is  $d_i^2 = \mathbf{\epsilon}_i^T \hat{\Sigma}_i^{-1} \mathbf{\epsilon}_i$ . If families' residual vectors are multivariate-normal, then variable  $d^2$  is expected to be distributed as chi-square, with  $df$  equal to family size  $s_i$ . The number of points in each panel is provided in its y-axis label. It can be seen that the chi-square distribution is a reasonably good approximation to the data, except for a few outliers.
